# Supplementary material for: Genome-wide siRNA screen identifies UNC50 as a regulator of Shiga toxin 2 trafficking
Source: PubMed Central journal article supplement — J Cell Biol. 2017 Oct 2;216(10):3249–62. doi: 10.1083/jcb.201704015 (PMC5626549; doi:10.1083/jcb.201704015), 2017-10-02
Supplement: JCB_201704015_sm.pdf [file JCB_201704015_sm.pdf]

Selyunin et al., <https://doi.org/10.1083/jcb.201704015>

**Table S1** is a separate Excel file showing data from the STx1 primary screen.

**Table S2** is a separate Excel file showing data from the STx2 primary screen.

**Table S3** is a separate Excel file showing a list of primary screen hits that were specific for STx1 (STx1-unique hits), specific for STx2 (STx2-unique hits), or common for both toxins.

**Table S4** is a separate Excel file showing a list of primary screen hits predicted to localize to endosomes/Golgi.

**Table S5** is a separate Excel file showing secondary screen data.
